# Future Directions in Mucormycosis Research

Dimitrios P. Kontoyiannis,<sup>1</sup> Russell E. Lewis,<sup>1</sup> Oliver Lotholary,<sup>2</sup> Brad Spellberg,<sup>3</sup> Georgios Petrikos,<sup>4</sup> Emmanuel Roilides,<sup>5</sup> Ashraf Ibrahim,<sup>3</sup> and Thomas J. Walsh<sup>6</sup>

<sup>1</sup>Department of Infectious Diseases, Infection Control and Employee Health, The University of Texas MD Anderson Cancer Center, Houston; <sup>2</sup>Service des Maladies Infectieuses et Tropicales Hôpital Necker-Enfants Malades, Université Paris, France; <sup>3</sup>Division of General Internal Medicine, Los Angeles Biomedical Research Institute at Harbor–University of California, Los Angeles (UCLA) Medical Center, David Geffen School of Medicine at UCLA, and Division of Infectious Diseases, Harbor–UCLA Medical Center; <sup>4</sup>Kapodistriakon University of Athens, <sup>5</sup>Third Department of Pediatrics, Aristotle University, Hippokraton Hospital, Thessaloniki, Greece; and <sup>6</sup>Division of Infectious Diseases, Weill Medical College of Cornell University, New York–Presbyterian Hospital, New York

**Mucormycosis has emerged as an important opportunistic infection, especially in severely immunosuppressed hosts. The evolving epidemiology, immunopathogenesis, molecular virulence studies, early diagnosis, and pitfalls in designing clinical studies of mucormycosis are discussed in this article.**

Mucormycosis (zygomycosis) has emerged as a formidable infection in an increasing population of patients with various forms of chronic and/or severe immunosuppression [1, 2]. An explosion in the number of published studies on this devastating opportunistic fungal infection over the past decade (Figure 1) reflects the ever-increasing awareness by the infectious disease community. In this article we examine the clinical and research issues regarding this rapidly changing field (Table 1).

## EPIDEMIOLOGY

The epidemiology of mucormycosis over the past 2 decades has been complex and, at times, controversial [3]. The exact prevalence and incidence of this infection are unclear because mucormycosis is not reportable. Also, difficulties in diagnosis of mucormycosis in the current era of very low autopsy rates [4] and relative inaccuracy of hospital discharge codes [5] make assessment of the true burden of this infection challenging.

The results of a recent population-based study of mucormycosis in France that relied heavily on hospital discharge codes [6] echoed those in several recent reports from the United States. These studies noted an increasing incidence of mucormycosis, especially in hematology and hematopoietic stem cell transplant (HSCT) units [1, 2, 7]. Although this increased incidence coincided with the introduction of *Aspergillus*-active agents such as the echinocandins and voriconazole [2], attributing this trend solely to use of these antifungals may be overly simplistic [8]. Changes in patient profiles and qualitative elements of their immunosuppression may also play equally important roles [8]. In fact, the incidence of this infection was already increasing in the mid-1990s [7, 9]. In addition, the population-based study in France also evidenced an increased incidence in patients with diabetes who were not typically exposed to either voriconazole or the echinocandins [6]. Furthermore, it remains to be seen whether widespread use of posaconazole in prophylaxis (as adopted in several guidelines [10]) decreases the incidence of documented mucormycosis and whether the incidence of posaconazole-resistant mucormycosis would increase. The latter may be a reasonable concern in view of the reported frequent underexposure of patients to adequate levels of posaconazole, which is absorbed poorly [11–13], and because only 1 point mutation on the cytochrome P450 14 $\alpha$ -demethylase can cause resistance of *Aspergillus* species to posaconazole

Correspondence: Dimitrios P. Kontoyiannis, MD, ScD, Department of Infectious Diseases, Infection Control and Employee Health, Unit 1406, The University of Texas MD Anderson Cancer Center, 1515 Holcombe Blvd, Houston, TX 77030 (dkontoyi@mdanderson.org).

**Clinical Infectious Diseases** 2012;54(S1):S79–85

© The Author 2012. Published by Oxford University Press on behalf of the Infectious Diseases Society of America. All rights reserved. For Permissions, please e-mail: journals.permissions@oup.com.

DOI: 10.1093/cid/cir886

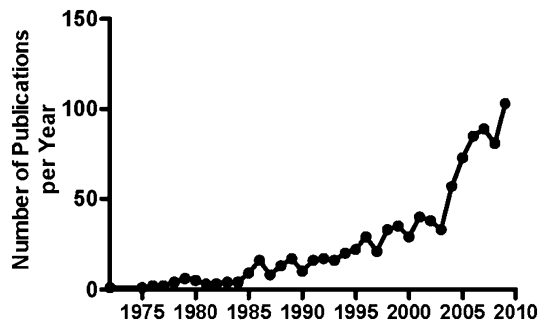

**Figure 1.** Number of articles published annually on mucormycosis since 1975 (source: SCOPUS, accessed 16 April 2010).

[14]. In fact, researchers have already reported cases of breakthrough mucormycosis to posaconazole [15].

Other changes in the management of mucormycosis in patients with hematologic cancers at high risk for this infection may increase or decrease the incidence of mucormycosis in this population. Some examples of these changes are worth mentioning. For example, researchers recently found that pre-existing iron overload is a predictor of poor outcome and increased adverse effects, such as bacterial and fungal infections (including mucormycosis) and organ toxicity in patients with hematologic malignancies or recipients of HSCTs [16]. Therefore, in view of the availability of the relatively nontoxic oral iron chelator deferasirox [17], hematologists may be quick to administer this agent early in the natural history of a hematologic cancer [18]. Because deferasirox has activity against Zygomycetes [19, 20], its use to treat iron overload in patients with hematologic malignancies could theoretically decrease the occurrence of mucormycosis. Others have formulated hypotheses about

the indirect consequences of using nonantifungal drugs on the epidemiology of mucormycosis. Specifically, despite the explosion of the diabetes epidemic over the last 2 decades, the incidence of mucormycosis has been shown to be in constant decline in the diabetic population in some [7], but not all [6], studies during this time. Also, because statins are routinely prescribed for diabetic patients receiving treatment of hyperlipidemia and with anti-Zygomycetes effects [21, 22], the association may be more than a coincidence and may illustrate the complexity and “fluidity” of the epidemiology of mucormycosis.

We have only begun to scratch the surface regarding the complicated observation of mucormycosis cases in some but not all tertiary cancer centers [6] (B. Parks and D. P. Kontoyiannis, unpublished data). Could this inconsistency be related to the intensity of diagnostic workup for mucormycosis? The recently published TRANSNET registry showed that this indeed may be the case for the more common mold infection invasive aspergillosis (IA) (ie, centers that performed high numbers of HSCTs had increased incidences of IA) [23]. Could this be related to unique geographical exposure to Zygomycetes in the environment or due to weather patterns? A recent study showed that the latter partially explains differences in the incidence of IA between the transplant center at Fred Hutchinson Cancer Research Center in Seattle, Washington, and the HSCT service at The University of Texas MD Anderson Cancer Center in Houston [24]. Only carefully obtained prospective surveillance data from North America, Europe, and other continents could capture the true burden of mucormycosis and the dynamics of the evolution of its epidemiology; researchers have begun to report on such data [25–28]. These studies are particularly important in evaluating the feasibility of and target populations for future clinical trials of mucormycosis treatment.

**Table 1. Clinical and Research Issues Relating to Mucormycosis Research**

|                                                                                                                                                         |  |
|---------------------------------------------------------------------------------------------------------------------------------------------------------|--|
| Epidemiology                                                                                                                                            |  |
| Prospective international registries to determine the burden of mucormycosis and impact of antifungal use in diagnosis and identify host groups at risk |  |
| Development of molecular fingerprinting methods to better define nosocomial versus community-acquired mucormycosis                                      |  |
| Pathogenesis                                                                                                                                            |  |
| Comparative studies of the immunopathogenesis of mucormycosis versus aspergillosis                                                                      |  |
| Ability to identify innate immune defects in the host that increase risk                                                                                |  |
| Innovative animal models in phylogenetically disparate hosts                                                                                            |  |
| Molecular tool sets for studying the molecular Koch’s postulates regarding Zygomycetes virulence                                                        |  |
| Diagnosis                                                                                                                                               |  |
| DNA- or antigen-based detection for early diagnosis (eg, before the first radiologic appearance of lesions)                                             |  |
| Host and radiologic predictors for diagnosis of mucormycosis versus other mold infections                                                               |  |
| Clinical research                                                                                                                                       |  |
| Development of guidelines to decrease practice divergence                                                                                               |  |
| Innovative study design                                                                                                                                 |  |
| Definition of the comparators in a trial with monotherapy arms or monotherapy versus combination therapy based on risk stratification                   |  |

**Table 2. Identification of Molecular Mechanisms of *Rhizopus* Species Pathogenesis and Immunopathogenesis in the Postgenomic Era**

|                                                                                                                                                                                                                                                                                |
|--------------------------------------------------------------------------------------------------------------------------------------------------------------------------------------------------------------------------------------------------------------------------------|
| Define the complete transcriptome for early colonization and adhesion to epithelia                                                                                                                                                                                             |
| Identify patterns of gene expression during hyphal growth, tissue invasion                                                                                                                                                                                                     |
| Identify the blood factors (eg, neutrophils, complement factor) that are able to control <i>Rhizopus</i> species growth and prevent its dissemination                                                                                                                          |
| Identify signaling pathways involved in escape of Zygomycetes from the blood compartments across the endothelial lining to grow in deep-seated organs (eg, iron acquisition–regulating genes, hyphally associated genes, thermal stress genes, starvation-responsive pathways) |

Finally, molecular tools with improved definition of the clonality of mucormycosis cases and its hospital acquisition would help tremendously in improving description of the epidemiology of mucormycosis [2]. This area of study is in its infancy, so more work is needed.

## **PATHOGENESIS**

Investigators have recently made tremendous strides in deciphering the pathogenesis of mucormycosis [3, 29, 30]. They built these efforts on the results of classic studies from the 1980s documenting the important, unique role of iron acquisition in this pathogenesis [31–34]. Findings point to iron chelation as an important therapeutic strategy deserving of further exploration [19]. The recent sequencing of the *Rhizopus* genome [35] and development of molecular tool sets for studying gene function [36] are expected to rapidly increase our understanding of the unique virulence properties of the fungus. Evidence of widespread genome duplication in *Rhizopus* [35] has shed light on the known attributes of Zygomycetes virulence, specifically, versatility, robust growth, and multidrug resistance [3, 29, 37]. Table 2 lists some specific steps to take when studying the molecular pathogenesis of mucormycosis in the postgenomic era. We believe that comparative study of the immunopathogenesis of IA and mucormycosis in relevant experimental systems and under different immunosuppression scenarios (eg, corticosteroid use versus neutropenia) is equally important.

Zygomycetes species have great affinity for blood vessels, invade rapidly, and disseminate widely [3]. Furthermore, hemorrhagic necrosis is the hallmark of mucormycotic tissue lesions [38]. However, important questions remain. For example, which endothelial receptors are utilized by Zygomycetes for invasion [39, 40]? Previous data demonstrated the ability of Mucorales to bind, invade, and damage human umbilical vein endothelial cells in vitro [39]. A recent study demonstrated that glucose regulated protein 78 (GRP78) serves as a receptor that promotes the ability of Mucorales to invade endothelial cells lining blood vessels [40]. Elevated concentrations of glucose and iron, consistent with those seen during diabetic ketoacidosis, enhance GRP78 expression and resulting invasion and damage of endothelial cells in a receptor-dependent manner [40]. These findings likely explain the unique susceptibility of diabetic ketoacidosis to mucormycosis.

Also, what is the exact mechanism of immune evasion by Zygomycetes? And, finally, can Zygomycetes disrupt endothelial integrity via mycotoxin production as shown recently in cases of experimental IA [41]? Development of novel models of this infection would be welcomed because researchers have relied heavily on murine models of hyperacute disseminated (via intravenous introduction) and pulmonary (via inhalation of high fungal loads) mucormycosis [42]. Mini–host models of mucormycosis (*Drosophila*) have shed light on the Toll-independent mechanisms of evasion of Zygomycetes species in contrast with those seen for IA [43]. Also, the recent development of subacute, subcutaneous murine models of mucormycosis (D. P. Kontoyiannis, unpublished data) may help in the study of tissue- and inoculum-specific differences in the pathogenesis of mucormycosis. Finally, preclinical studies of the immunomodulatory effects and comparative pharmacokinetics of antifungals are needed [44, 45]. The upcoming decade is expected to be an era of intense activity in studying mucormycosis that hopefully will lead to new avenues for diagnosis, immune monitoring, and antifungal drug discovery.

## **DIAGNOSIS**

Early diagnosis of mucormycosis remains challenging and is a major unmet need, causing a bottleneck in devising innovative, effective clinical trials. This is important because delayed treatment clearly impacts the outcome of mucormycosis [46]. Major problems in the diagnosis of mucormycosis include its elusive clinical presentation and frequent occult dissemination [9], a lack of sensitive nonculture-based diagnostic methods (eg, antigen and molecular detection platforms), and the fact that culture of samples obtained from nonsterile sites (eg, sputum) is neither sensitive [9, 47] nor specific [9, 47, 48]. Tissue-based diagnosis remains the gold standard, although patients frequently are not candidates for biopsy analysis because of thrombocytopenia or hemodynamic instability. Even with tissue-based diagnostic methods, sampling errors and occasional difficulties in differentiating Zygomycetes from distorted hyalohyphomycetes in tissue samples result in false-negative or false-positive results [49]. Furthermore, paradoxically, two-thirds of histopathologically proven mucormycosis cases are culture negative [47]. It has not yet been determined whether optimal

processing of infected tissue samples and adaptation of culture conditions to simulate semi-anaerobic growth [50] require further validation.

Morphologic identification of Zygomycetes at the species level is reasonably accurate, especially when performed in high-volume [2] or reference clinical microbiology [51] laboratories. Of note, carbon-assimilation profiles have been reported to be a promising tool for the precise identification of Zygomycetes [52]. Polymerase chain reaction–based detection of Zygomycetes fungi remains investigational [53], although recent data reveal that ITS sequencing was promising for identification of Zygomycetes genus/species from culture, frozen sections, or paraffin-embedded sections of infected tissues [54, 55]. Whether detection of volatile compounds produced by Zygomycetes fermentation in patients with mucormycosis is of help in diagnosis is an unexplored area. An equally important unexplored area is identification of diagnostic factors that favor mucormycosis over the more common IA on clinical grounds. Retrospective single-institution studies focusing on patients with leukemia and/or recipients of HSCTs identified prior voriconazole exposure, community-acquired pansinusitis, hyperglycemia (eg, steroid-induced), multiple (>10) nodules detected on chest computed tomography scans, pleural effusion, and the reverse halo sign as markers potentially favoring a diagnosis of mucormycosis over a diagnosis of aspergillosis [56, 57]. Prospective validation and similar studies of other populations at risk for mucormycosis are needed. Development of a “scorecard” for diagnosis of mucormycosis would be ideal.

## TREATMENT

The literature on mucormycosis is modestly helpful to clinicians managing this infection. However, “primary” prospective mucormycosis treatment data have yet to be reported [3]. Both salvage and single-institution retrospective studies should be viewed with caution in light of the multiple inherent biases [58]. Multiple controversies remain. For example, host heterogeneity, pleiotropic clinical presentation (at least 6 clinical syndromes), the multitude of Zygomycetes species, factors related to surgery (eg, timing, radicalness), and the influence or correction of underlying metabolic (eg, ketoacidosis) and immunosuppressive (eg, neutrophil recovery in neutropenic patients, steroid tapering in patients receiving corticosteroids) conditions lead to complex and at times highly individualized scenarios for management of mucormycosis [3]. For example, recent studies at The University of Texas MD Anderson Cancer Center showed that a lack of corticosteroid tapering, monocytopenia and persistent neutropenia, and a lack of early treatment of mucormycosis were powerful independent predictors of poor outcome of this infection [56].

**Table 3. Potential Components of Mucormycosis Risk Stratification at Baseline**

|                                            |
|--------------------------------------------|
| Preenrollment characteristic               |
| Age (>40 vs <40 years)                     |
| Type of hematopoietic stem cell transplant |
| Allogeneic                                 |
| Autologous                                 |
| Relapsed leukemia                          |
| Interval from diagnosis to surgery         |
| Early (1–7 days)                           |
| Intermediate (8–14 days)                   |
| Late (>14 days)                            |
| Diabetes control                           |
| Good                                       |
| Poor                                       |
| Staging of mucormycosis                    |
| Disseminated                               |
| Rhinocephalic                              |
| Multifocal pulmonary                       |

In our view, a successful clinical trial of treatment of mucormycosis hinges on the following factors:

- Enthusiastic participation of all investigators so that as many patients as possible are enrolled and protocol violations are kept to a minimum.
- Risk stratification using a scoring system. Table 3 depicts a possible scoring system that is based on preenrollment patient characteristics. Unfortunately, such scoring systems have yet to be developed and validated not only for mucormycosis but also for other clinically important fungal infections.
- Early sensitive diagnosis and staging of mucormycosis at baseline (eg, using computed tomography) to intervene early in the natural history of the infection and assist in risk stratification, respectively.
- Use of liberal inclusion criteria to allow a degree of preexisting renal or hepatic dysfunction.
- In view of the rarity of mucormycosis, use of an innovative statistical design for power calculation like that used for rare, complex oncologic entities (eg, adaptive randomization) [59].
- Preenrollment of possible cases (conditional enrollment) and obtainment of definitive diagnoses within 7–10 days after enrollment, perhaps with analysis of possible mucormycosis cases as supportive evidence.
- Superiority trial with a margin of 15%. For example, the pivotal trial of voriconazole versus amphotericin B deoxycholate in treatment of IA had a noninferiority margin of 20% [60].
- The timing for assessment of response of mucormycosis to treatment should reflect the natural history of the

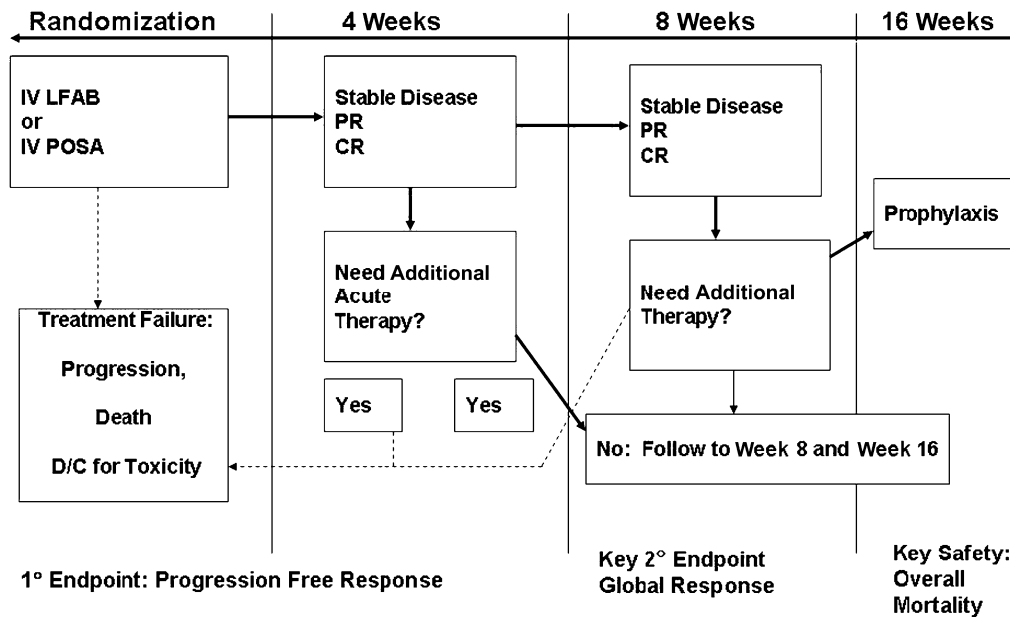

**Figure 2.** Potential study design for examining primary monotherapy for mucormycosis. Abbreviations: CR, complete response; D/C, discontinuation; IV, intravenous; LFAB, lipid formulation of amphotericin B; POSA, posaconazole; PR, partial response.

infection and the treatment effect (not too early or too late). Therefore, different endpoints and scenarios for analysis as a function of time after enrollment (eg, progression-free response rate at week 4, global response rate at week 8, overall mortality rate at week 12) may be used. The lack of a validated outcome measure or surrogate endpoint that is reproducible, free of bias, and correlates with treatment effect rather than underlying disease effect remains a major issue.

- In terms of treatment comparators, different options are available depending in part on the feasibility of industry support for such a complex and relatively infrequent infection and small market. Potential combination strategies have been the subject of a previous article in this supplement. The expected introduction of intravenous and oral posaconazole formulations with reliable pharmacokinetics opens the possibility of performing a randomized study of monotherapy with a lipid formulation of amphotericin B versus that with intravenous posaconazole for severe mucormycosis. Figure 2 shows a design for such a study.
- Finally, the inability to control for variability of practice (diagnosis and/or management) across a large number of centers and heterogeneous hosts is perhaps the most important threat to a successful trial, as shown in the recently published Deferasirox-AmBisome Therapy for Mucormycosis study [61]. Perhaps creating regional “centers of excellence” for managing this infection both medically and surgically would result in less variability.

## CONCLUSIONS

In the symposium from which this supplement was derived, all of the scientists, physician-investigators, laypersons, Henry Schueler, and relatives and friends of Henry Schueler, the heroic child who died of this devastating infection, had a palpable sense of working in a frontier of clinical mycology. Much work remains ahead of us. By mobilizing resources, organizing, expanding intellectual energy, and thinking innovatively, we can make strides in improving outcomes of mucormycosis.

## Notes

**Acknowledgments.** We thank our patients for providing the inspiration for doing research related to this disease.

**Financial support.** This research is supported in part by the National Institutes of Health through MD Anderson’s Cancer Center Support Grant CA016672.

**Supplement sponsorship.** This article was published as part of a supplement entitled “Advances Against Mucormycosis: A Tribute to the Memory and Courage of Hank Schueler,” sponsored by the Henry Schueler 41&9 Foundation.

**Potential conflicts of interest.** R. L. has received grant support from Merck & Co, Gilead, Astellas, and Enzon. O. L. has received grant support from Gilead; has received grant support from and has been a consultant for Astellas; and has served on speakers’ bureaus for Astellas, Gilead, Pfizer, Schering-Plough, and Merck. B. S. has received grant support from Gilead, Astellas, and Novartis; has been a consultant for Merck, Pfizer, Arpida, Theravance, Advanced Life Sciences, Basilea, The Medicines Company, Novo Nordisk, Novartis, and Cerexa; and is a shareholder of NovaDigm Therapeutics and Neutropenia Immunotherapy Solutions. T. J. W. has received grant support from Novartis and Astellas, and has been a consultant for Trius, iCo, Sigma Tau, Draius, and Novartis. D. K. has served on the board and received consultancy support from Schering-Plough and Merck.

E. R. has been a consultant for Schering-Plough, Gilead, Astellas, Cephalon, Pfizer, Wyeth, Merck, and Aventis, and has lectured at or served on speakers' bureaus for Pfizer, Gilead, Enzon, Schering-Plough, and Wyeth. A. I. has received grant support from Astellas, Enzon, Gilead, Merck, Pfizer, NovaDigm Therapeutics, and Novartis, and is a shareholder of NovaDigm Therapeutics and Spectral Platforms. G. P. has received research grants from Gilead, Pfizer, Schering-Plough, Aventis, and MSD; has acted as paid consultant to Janssen-Cilag, Gilead, Astellas, and Schering-Plough; and is a member of the speakers' bureaus for Gilead, Schering-Plough, and MSD.

All authors have submitted the ICMJE Form for Disclosure of Potential Conflicts of Interest. Conflicts that the editors consider relevant to the content of the manuscript have been disclosed.

## References

1. Neofytos D, Horn D, Anaissie E, et al. Epidemiology and outcome of invasive fungal infection in adult hematopoietic stem cell transplant recipients: analysis of Multicenter Prospective Antifungal Therapy (PATH) Alliance registry. *Clin Infect Dis* **2009**; 48:265–73.
2. Kontoyiannis DP, Lionakis MS, Lewis RE, et al. Zygomycosis in a tertiary-care cancer center in the era of *Aspergillus*-active antifungal therapy: a case-control observational study of 27 recent cases. *J Infect Dis* **2005**; 191:1350–60.
3. Kontoyiannis DP, Lewis RE. Agents of mucormycosis and related species. In: Mandell GL, Bennett JE, Dolin R, eds. Principles and practice of infectious diseases, 6th ed. Vol 2. Philadelphia, PA: Elsevier Churchill Livingstone, **2005**.2973–81.
4. Chamilos G, Luna M, Lewis RE, et al. Invasive fungal infections in patients with hematologic malignancies in a tertiary care cancer center: an autopsy study over a 15-year period (1989–2003). *Haematologica* **2006**; 91:986–9.
5. Chang DC, Burwell LA, Lyon GM, et al. Comparison of the use of administrative data and an active system for surveillance of invasive aspergillosis. *Infect Control Hosp Epidemiol* **2008**; 29:25–30.
6. Bitar D, Van Cauteren D, Lanternier F, et al. Increasing incidence of zygomycosis (mucormycosis), France, 1997–2006. *Emerg Infect Dis* **2009**; 15:1395–440.
7. Roden MM, Zaoutis TE, Buchanan WL, et al. Epidemiology and outcome of zygomycosis: a review of 929 reported cases. *Clin Infect Dis* **2005**; 41:634–53.
8. Pongas GN, Lewis RE, Samonis G, Kontoyiannis DP. Voriconazole-associated zygomycosis: a significant consequence of evolving antifungal prophylaxis and immunosuppression practices? *Clin Microbiol Infect* **2009**; 15:93–7.
9. Kontoyiannis DP, Wessel VC, Bodey GP, Rolston KV. Zygomycosis in the 1990s in a tertiary-care cancer center. *Clin Infect Dis* **2000**; 30: 851–6.
10. Walsh TJ, Anaissie EJ, Denning DW, et al. Treatment of aspergillosis: clinical practice guidelines of the Infectious Diseases Society of America. *Clin Infect Dis* **2008**; 46:327–60.
11. Krishna G, Martinho M, Chandrasekar P, Ullmann AJ, Patino H. Pharmacokinetics of oral posaconazole in allogeneic hematopoietic stem cell transplant recipients with graft-versus-host disease. *Pharmacotherapy* **2007**; 27:1627–36.
12. Smith WJ, Drew RH, Perfect JR. Posaconazole's impact on prophylaxis and treatment of invasive fungal infections: an update. *Expert Rev Anti Infect Ther* **2009**; 7:165–81.
13. Andes D, Pascual A, Marchetti O. Antifungal therapeutic drug monitoring: established and emerging indications. *Antimicrob Agents Chemother* **2009**; 53:24–34.
14. Mann PA, Parmegiani RM, Wei SQ, et al. Mutations in *Aspergillus fumigatus* resulting in reduced susceptibility to posaconazole appear to be restricted to a single amino acid in the cytochrome P450 14 $\alpha$ -demethylase. *Antimicrob Agents Chemother* **2003**; 47: 577–81.
15. Lekakis LJ, Lawson A, Prante J, et al. Fatal rhizopus pneumonia in allogeneic stem cell transplant patients despite posaconazole prophylaxis: two cases and review of the literature. *Biol Blood Marrow Transplant* **2009**; 15:991–5.
16. Koreth J, Antin JH. Iron overload in hematologic malignancies and outcome of allogeneic hematopoietic stem cell transplantation. *Haematologica* **2010**; 95:364–6.
17. Brittenham GM. Iron-chelating therapy for transfusional iron overload. *N Engl J Med* **2011**; 364:146–56.
18. Vichinsky E. Clinical application of deferasirox: Practical patient management. *Am J Hematol* **2007**; 83:398–402.
19. Ibrahim AS, Spellberg B, Edwards J Jr. Iron acquisition: a novel perspective on mucormycosis pathogenesis and treatment. *Curr Opin Infect Dis* **2008**; 21:620–5.
20. Ibrahim AS, Gebermarim T, Fu Y, et al. The iron chelator deferasirox protects mice from mucormycosis through iron starvation. *J Clin Invest* **2007**; 117:2649–57.
21. Kontoyiannis DP. Decrease in the number of reported cases of zygomycosis among patients with diabetes mellitus: a hypothesis. *Clin Infect Dis* **2007**; 44:1089–90.
22. Chamilos G, Lewis RE, Kontoyiannis DP. Lovastatin has significant activity against zygomycetes and interacts synergistically with voriconazole. *Antimicrob Agents Chemother* **2006**; 50:96–103.
23. Kontoyiannis DP, Marr KA, Park BJ, Alexander BD, et al. Prospective surveillance for invasive fungal infections in hematopoietic stem cell transplant recipients, 2001–2006: overview of the Transplant-Associated Infection Surveillance Network (TRANSNET) Database. *Clin Infect Dis* **2010**; 50:1091–100.
24. Panackal AA, Li H, Kontoyiannis DP, et al. Geoclimatic influences on invasive aspergillosis rates following hematopoietic stem cell transplantation. *Clin Infect Dis* **2010**; 15:1588–97.
25. Røping MJ, Heinz WJ, Kindo AJ, et al. Forty-one recent cases of invasive zygomycosis from a global clinical registry. *J Antimicrob Chemother* **2010**; 65:296–302.
26. Ambrosioni J, Bouchuiguir-Wafa K, Garbino J. Emerging invasive zygomycosis in a tertiary care center: epidemiology and associated risk factors. *Int J Infect Dis* **2010**; 14 Suppl 3:e100–3.
27. Singh N, Aguado JM, Bonatti H, et al. Zygomycosis in solid organ transplant recipients: a prospective, matched case-control study to assess risks for disease and outcome. *J Infect Dis* **2009**; 200:1002–11.
28. Sun HY, Aguado JM, Bonatti H, et al. Pulmonary zygomycosis in solid organ transplant recipients in the current era. *Am J Transplant* **2009**; 9:2166–71.
29. Spellberg B, Edwards J Jr, Ibrahim A. Novel perspectives on mucormycosis: pathophysiology, presentation, and management. *Clin Microbiol Rev* **2005**; 18:556–69.
30. Ribes JA, Vanover-Sams CL, Baker DJ. Zygomycetes in human disease. *Clin Microbiol Rev* **2000**; 13:236–301.
31. Artis WM, Fountain JA, Delcher HK, Jones HE. A mechanism of susceptibility to mucormycosis in diabetic ketoacidosis: transferrin and iron availability. *Diabetes* **1982**; 31:1109–14.
32. Artis WM, Patrusky E, Rastinejad F, Duncan RL Jr. Fungistatic mechanism of human transferrin for *Rhizopus oryzae* and *Trichophyton mentagrophytes*: alternative to simple iron deprivation. *Infect Immun* **1983**; 41:1269–78.
33. Boelaert JR, de Locht M, Van Cutsem J, et al. Mucormycosis during deferoxamine therapy is a siderophore-mediated infection. In vitro and in vivo animal studies. *J Clin Invest* **1993**; 91:1979–86.
34. Spellberg B, Walsh TJ, Kontoyiannis DP, Edwards J Jr, Ibrahim AS. Recent advances in the management of mucormycosis: from bench to bedside. *Clin Infect Dis* **2009**; 48:1743–51.
35. Ma LJ, Ibrahim AS, Skory C, et al. Genomic analysis of the basal lineage fungus *Rhizopus oryzae* reveals a whole-genome duplication. *PLoS Genet* **2009**; 5:e1000549.



36. Jennessen J, Nielsen KF, Houbraken J, et al. Secondary metabolite and mycotoxin production by the *Rhizopus microsporus* group. *J Agric Food Chem* **2005**; 53:1833–40.
37. Dannaoui E, Meletiadiis J, Mouton JW, Meis J, Verweij PE. In vitro susceptibilities of zygomycetes to conventional and new antifungals. *J Antimicrob Chemother* **2003**; 51:45–52.
38. Ben-Ami R, Luna M, Lewis RE, Walsh TJ, Kontoyiannis DP. A clinicopathological study of pulmonary mucormycosis in cancer patients: extensive angioinvasion but limited inflammatory response. *J Infect* **2009**; 59:134–8.
39. Ibrahim AS, Spellberg B, Avanesian V, Fu Y, Edwards JE Jr. *Rhizopus oryzae* adheres to, is phagocytosed by, and damages endothelial cells in vitro. *Infect Immun* **2005**; 73:778–83.
40. Liu M, Spellberg B, Phan Q, et al. The endothelial cell receptor GRP78 is required for mucormycosis pathogenesis in diabetic mice. *J Clin Invest* **2010**; 120:1914–24.
41. Ben-Ami R, Lewis RE, Leventakos K, Kontoyiannis DP. *Aspergillus fumigatus* inhibits angiogenesis through the production of gliotoxin and other secondary metabolites. *Blood* **2009**; 114:5393–9.
42. Kamei K. Mycopathologia animal models of zygomycosis—*Absidia*, *Rhizopus*, *Rhizomucor*, and *Cunninghamella*. *Mycopathologia* **2001**; 152:5–13.
43. Chamilos G, Lewis RE, Hu J, et al. *Drosophila melanogaster* as a model host to dissect the immunopathogenesis of zygomycosis. *Proc Natl Acad Sci U S A* **2008**; 105:9367–72.
44. Lamarin GA, Lewis RE, Chamilos G, et al. Caspofungin-mediated beta-glucan unmasking and enhancement of human polymorphonuclear neutrophil activity against *Aspergillus* and non-*Aspergillus hyphae*. *J Infect Dis* **2008**; 198:186–92.
45. Ben-Ami R, Lewis RE, Kontoyiannis DP. Immunocompromised hosts: immunopharmacology of modern antifungals. *Clin Infect Dis* **2008**; 47:226–35.
46. Chamilos G, Lewis RE, Kontoyiannis DP. Delaying amphotericin B-based front-line therapy significantly increases mortality in hematologic malignancy patients with zygomycosis. *Clin Infect Dis* **2008**; 47:503–9.
47. Tarrand JJ, Lichtenfeld M, Warraich I, et al. Diagnosis of invasive septate mold infections. A correlation of microbiological culture and histologic or cytologic examination. *Am J Clin Pathol* **2003**; 119: 854–8.
48. Torres-Narbona M, Guinea J, Martínez-Alarcón J, Muñoz P, Peláez T, Bouza E. Workload and clinical significance of the isolation of zygomycetes in a tertiary general hospital. *Med Mycol* **2008**; 46:225–30.
49. Haurany N, Kontoyiannis DP, Slavin MA, et al. Interobserver reproducibility and concordance between culture and histopathology in invasive mold infections: a multicenter study [abstract 78]. In: 4th Advances Against Aspergillosis. Rome, Italy, **2010**.
50. Kontoyiannis DP, Chamilos G, Hassan SA, Lewis RE, Albert ND, Tarrand JJ. Increased culture recovery of zygomycetes under physiologic temperature conditions. *Am J Clin Pathol* **2007**; 127:208–12.
51. Alvarez E, Sutton DA, Cano J, et al. Spectrum of zygomycete species identified in clinically significant specimens in the United States. *J Clin Microbiol* **2009**; 47:1650–66.
52. Schwarz P, Lortholary O, Dromer F, Dannaoui E. Carbon assimilation profiles as a tool for identification of zygomycetes. *J Clin Microbiol* **2007**; 45:1433–9.
53. Kasai M, Harrington SM, Francesconi A, et al. Detection of a molecular biomarker for zygomycetes by quantitative PCR assays of plasma, bronchoalveolar lavage, and lung tissue in a rabbit model of experimental pulmonary zygomycosis. *J Clin Microbiol* **2008**; 46:3690–702.
54. Dannaoui E, Schwarz P, Slany M, et al. Molecular detection and identification of zygomycetes species from paraffin-embedded tissues in a murine model of disseminated zygomycosis: a collaborative European Society of Clinical Microbiology and Infectious Diseases (ESCMID) Fungal Infection Study Group (EFISG) evaluation. *J Clin Microbiol* **2010**; 48:2043–6.
55. Schwarz P, Bretagne S, Gantier JC, et al. Molecular identification of zygomycetes from culture and experimentally infected tissues. *J Clin Microbiol* **2006**; 44:340–9.
56. Chamilos G, Marom EM, Lewis RE, Lionakis MS, Kontoyiannis DP. Predictors of pulmonary zygomycosis versus invasive pulmonary aspergillosis in patients with cancer. *Clin Infect Dis* **2005**; 41:60–6.
57. Wahba H, Truong MT, Lei X, Kontoyiannis DP, Marom EM. Reversed halo sign in invasive pulmonary fungal infections. *Clin Infect Dis* **2008**; 46:1733–7.
58. van Burik JA, Hare RS, Solomon HF, Corrado ML, Kontoyiannis DP. Posaconazole is effective as salvage therapy in zygomycosis: a retrospective summary of 91 cases. *Clin Infect Dis* **2006**; 42:e61–5.
59. Berry DA, Eick SG. Adaptive assignment versus balanced randomization in clinical trials: a decision analysis. *Stat Med* **1995**; 14:231–46.
60. Herbrecht R, Denning DW, Patterson TF, et al. Voriconazole versus amphotericin B for primary therapy of invasive aspergillosis. *N Engl J Med* **2002**; 347:408–15.
61. Spellberg B, Ibrahim AS, Chin-Hong PV, et al. The Deferasirox-Ambisome therapy for Mucormycosis (DEFEAT Mucor) study: a randomized, double-blinded, placebo-controlled trial [published online ahead of print 20 September 2011]. *J Antimicrob Chemother* **2011**.
